# Supplementary material for: Optimized photoluminescence of red phosphor K2TiF6:Mn4+synthesized at room temperature and its formation mechanism
Source: Royal Society of Chemistry journal article supplement (doi:10.1039/c4tc02097a), 2014-12-17
Supplement: c4tc02097a1.pdf [file c4tc02097a1.pdf]

## Supporting Information

### Optimized photoluminescence of red phosphor $\text{K}_2\text{TiF}_6:\text{Mn}^{4+}$ synthesized at room temperature and its formation mechanism

Lifen Lv, Zhen Chen, Guokui Liu, Shaoming Huang, and Yuexiao Pan\*

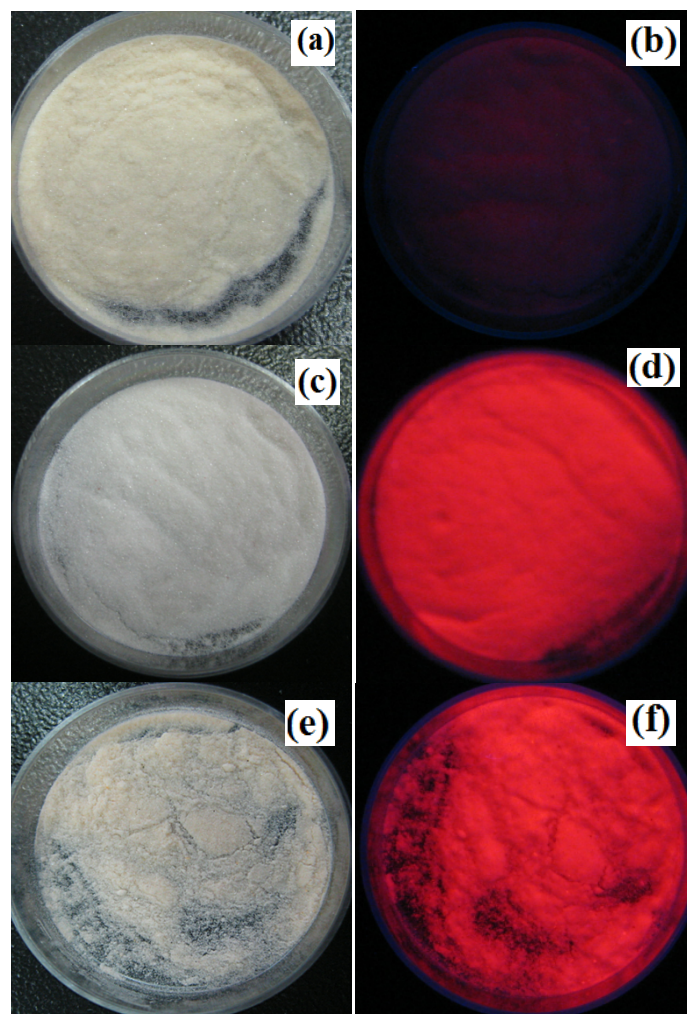

**Figure S1.** Photographs of the phosphor samples (a,b) KTFM-1, (c,d) KTFM-2, and (e,f) KTFM-3 (prepared according to the detailed experimental process as described in Table 1) under (a,c,e) visible light and (b,d,f) 365 nm UV light excitation, respectively.

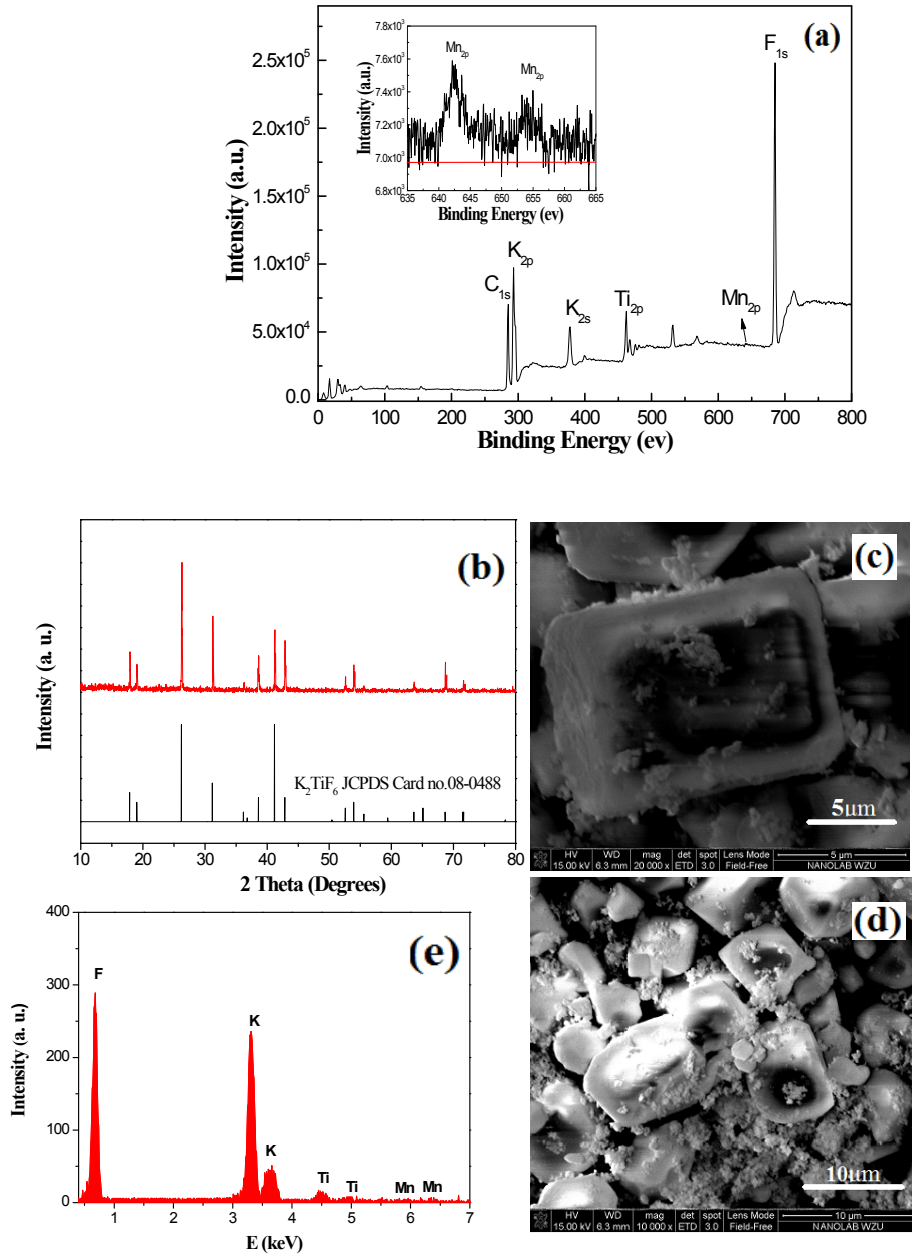

**Figure S2.** (a) X-ray photoelectron spectroscopy (XPS) of  $\text{K}_2\text{TiF}_6:\text{Mn}^{4+}$  prepared by from  $\text{Ti}(\text{OC}_4\text{H}_9)_4$ . (b) XRD, (c,d) SEM images, and (e) EDS spectrum of red phosphor  $\text{K}_2\text{TiF}_6:\text{Mn}^{4+}$  prepared from  $\text{TiO}_2$ .

Note: XPS spectrum was obtained with a PHI 5000 (ULVAC-PHI, Chigasaki, Kanagawa, Japan) system equipped with a 450 W monochromatic Al  $K\alpha$  X-ray under ultra-high vacuum.

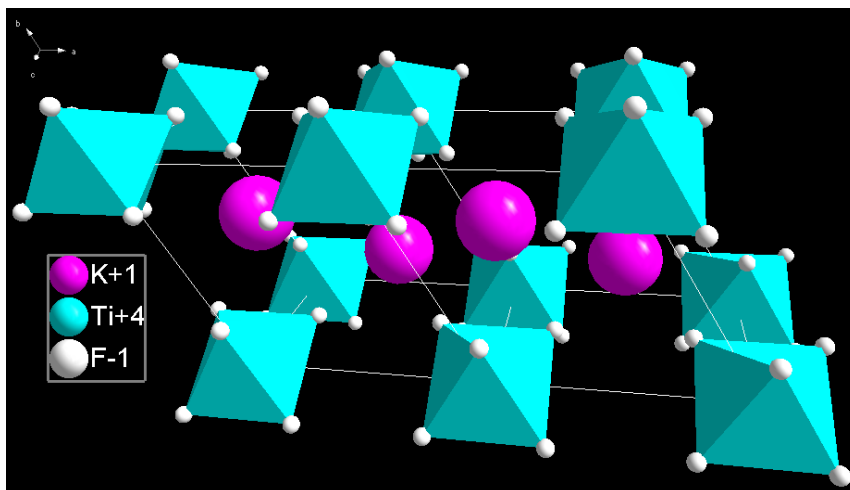

**Figure S3.** The structure projection of  $K_2TiF_6$  with hexagonal structure plotted by software Diomand 3.0.

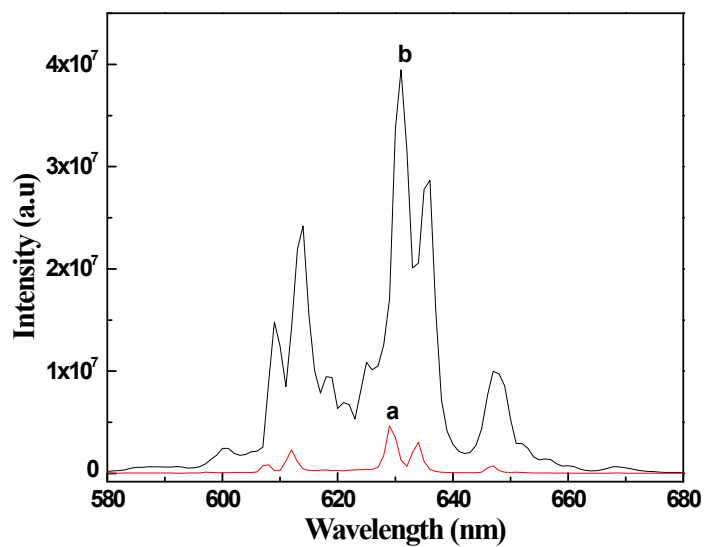

**Figure S4.** Emission spectra of red phosphors  $K_2TiF_6:Mn^{4+}$  prepared by etching (a)  $TiO_2$  and (b)  $Ti(OC_4H_9)_4$ , respectively. Note: all the other experimental parameters are identical for both synthetic techniques.

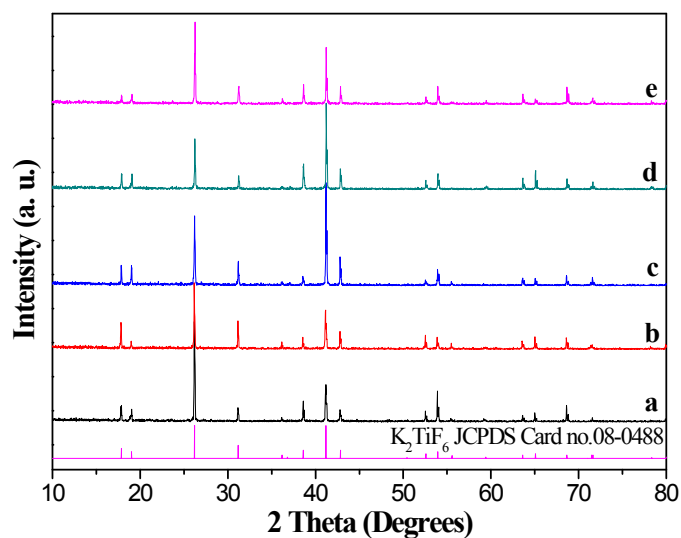

**Figure S5.** XRD patterns of red phosphors  $\text{K}_2\text{TiF}_6:\text{Mn}^{4+}$  prepared by wet chemical etching at room temperature with concentration of  $\text{KMnO}_4$  at (a) 0, (b) 5, (c) 10, (d) 25, (e) 30, (f) 60  $\text{mmol.L}^{-1}$ .

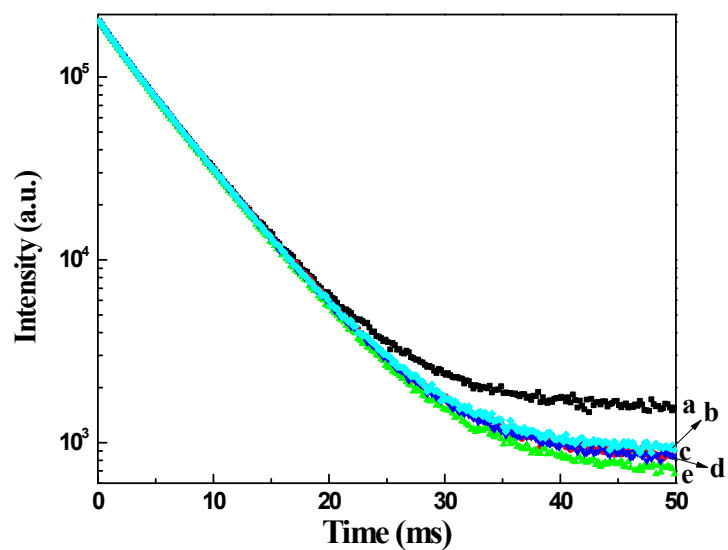

**Figure S6.** Decay curves of red phosphors  $\text{K}_2\text{TiF}_6:\text{Mn}^{4+}$  prepared by wet chemical etching at room temperature with concentration of  $\text{KMnO}_4$  at (a) 0, (b) 5, (c) 10, (d) 25, (e) 30, (f) 60  $\text{mmol.L}^{-1}$ .

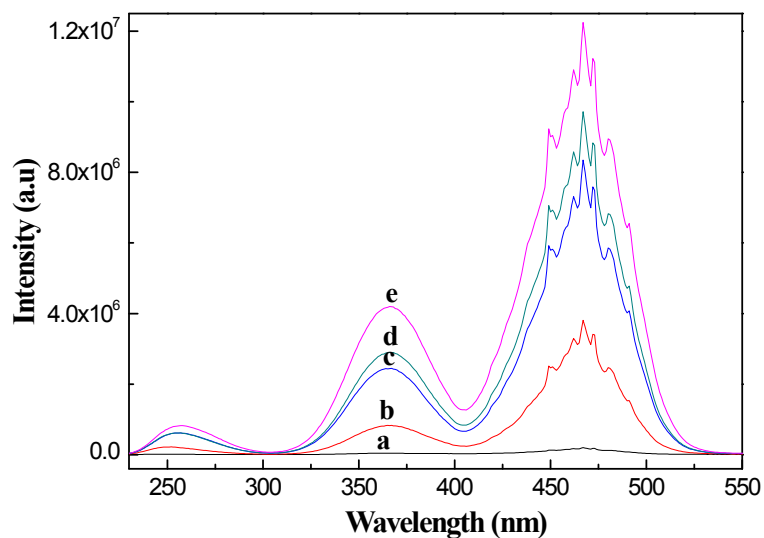

**Figure S7.** Excitation spectra (monitored at 631 nm) of red phosphors  $\text{K}_2\text{TiF}_6:\text{Mn}^{4+}$  prepared by wet chemical etching at room temperature with concentration of HF at (a) 5, (b) 10, (c) 20, (d) 30, (e) 40 wt.%.

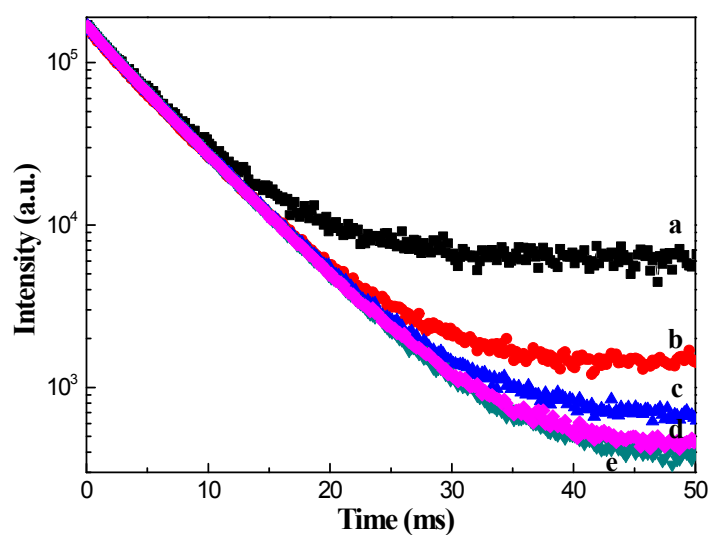

**Figure S8.** Dependence of decay of 631 nm emissions of red phosphor  $\text{K}_2\text{TiF}_6:\text{Mn}^{4+}$  (excited at 467 nm) prepared with concentration of HF at (a) 5, (b) 10, (c) 20, (d) 30, (e) 40 wt.%.

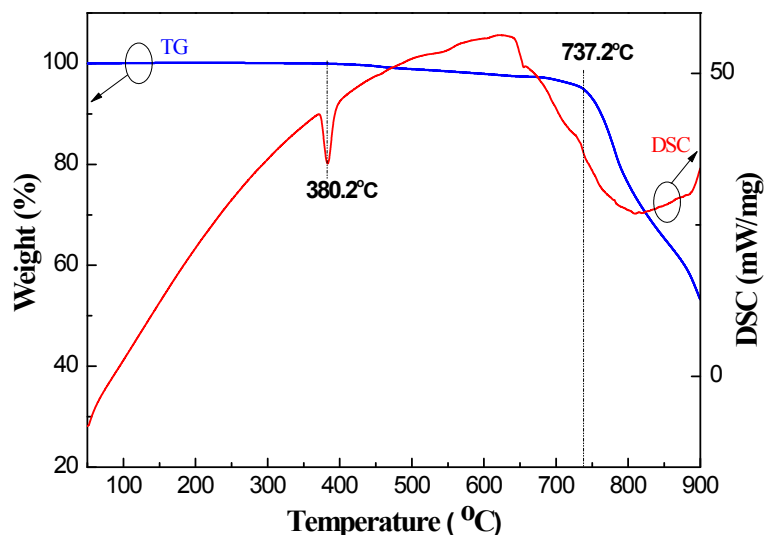

**Figure S9.** Thermogravimetrics (TG) and different scanning calorimeter (DSC) graphs of as synthesized  $\text{K}_2\text{TiF}_6:\text{Mn}^{4+}$  under  $\text{N}_2$  atmosphere. The thermal stability the red phosphor behavior of  $\text{K}_2\text{TiF}_6:\text{Mn}^{4+}$  is investigated by thermogravimetrics analysis and different scanning calorimeter (DSC; Netzsch STA 449 C, at a heating rate of 10K/min). (The data are repeatable).

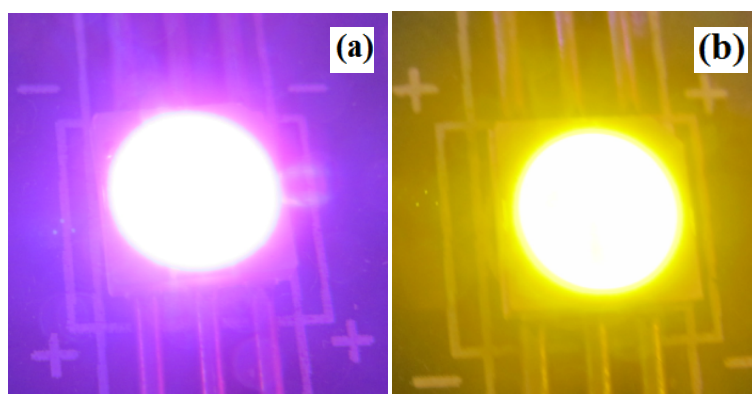

**Figure S10.** Photographs of (a) purple LED fabricated with  $\text{K}_2\text{TiF}_6:\text{Mn}^{4+}$ , and (b) "warm" white LED fabricated with  $\text{K}_2\text{TiF}_6:\text{Mn}^{4+}$  and  $\text{YAG}:\text{Ce}^{3+}$  driven at under 60-mA current. The LEDs were examined by a LEE300E UV-Vis-near IR spectrophotometer (Everfine photo-E-Infor Co., China).
